# Supplementary material for: β-blockers and risk of all-cause mortality in patients with chronic heart failure and atrial fibrillation—a meta-analysis
Source: Springer Nature journal article supplement (doi:10.1186/s12872-019-1079-2), 2019-06-03

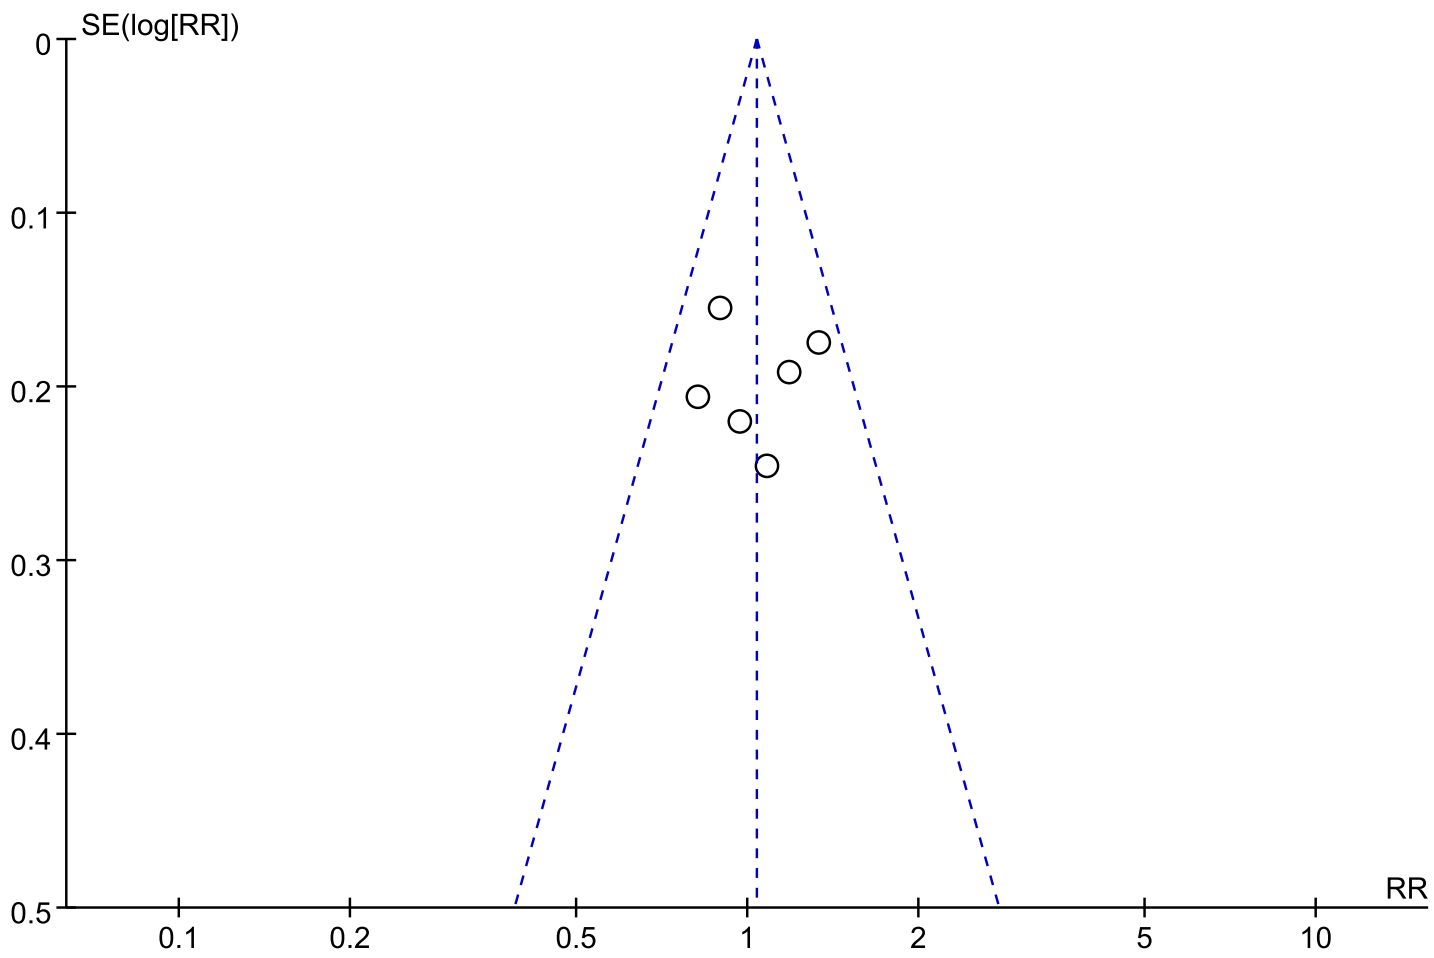

Supplement: MOESM4 [file 16767892]
